# Supplementary material
Source: Springer Nature journal article supplement (https://www.springermedizin.de/resource/supplementary/12885_2001_6_MOESM1_ESM.pdf/9460036)

Anti-HsMCM2

Anti-Ki-67

Normal  
Bronchial  
Mucosa

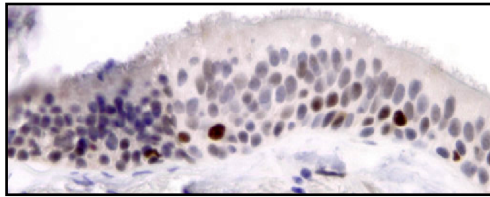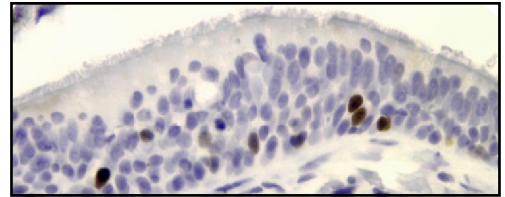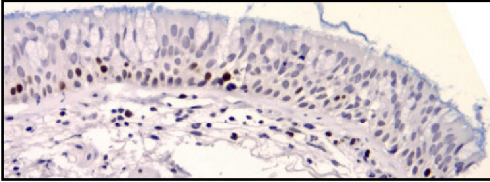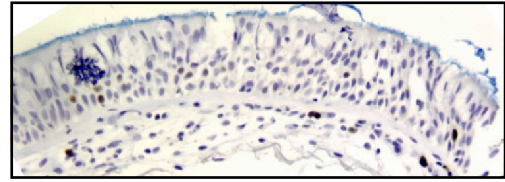

Meta-  
plasia

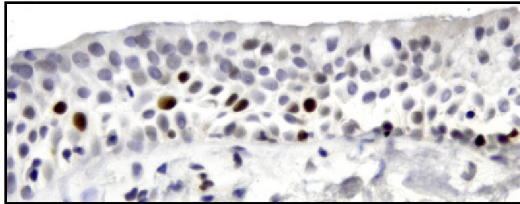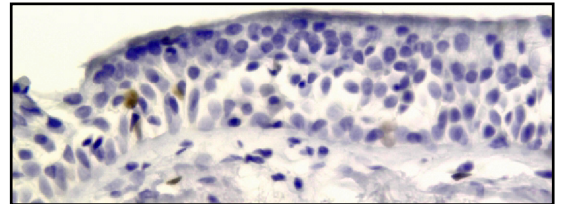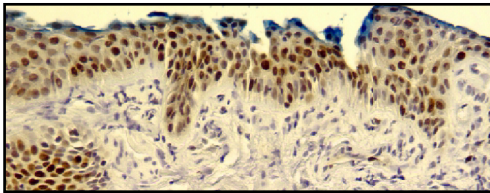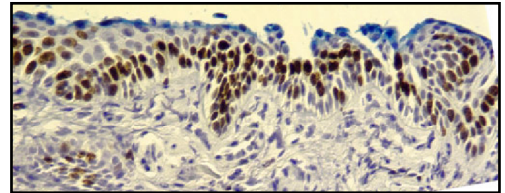

High  
Grade  
Dysplasia

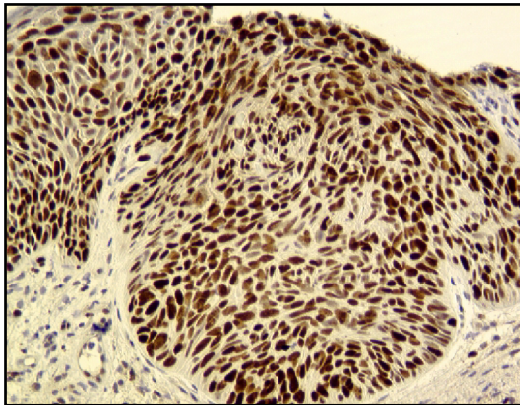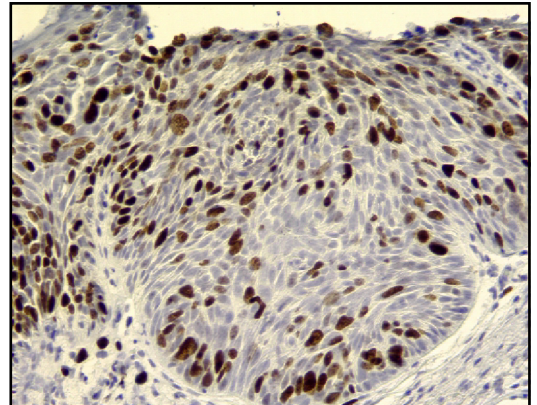

Carcinoma  
in situ

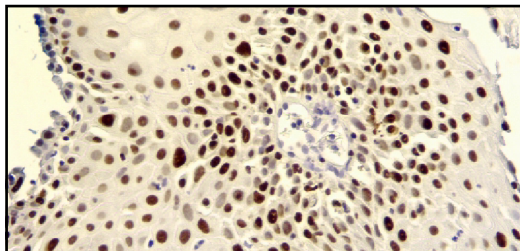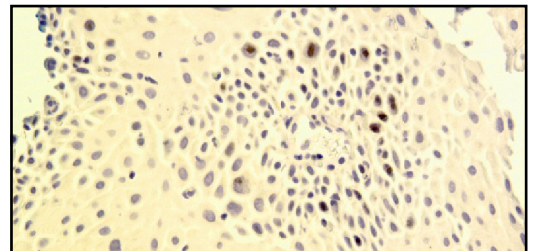

Supplement: MOESM1 [file 9460036]
